# 1 Estimating the age of poorly dated fossil specimens and deposits using a 2 total-evidence approach and the fossilized birth-death process

3 Joëlle Barido-Sottani<sup>1,4,\*</sup>, Dagmara Żyła<sup>1,2,3</sup>, and Tracy A. Heath<sup>1</sup>

4 <sup>1</sup>*Department of Ecology, Evolution and Organismal Biology, Iowa State University, Ames, USA*

5 <sup>2</sup>*University of Gdańsk, Gdańsk, Poland*

6 <sup>3</sup>*Museum of Nature Hamburg, Leibniz Institute for the Analysis of Biodiversity Change,  
7 Hamburg, Germany*

8 <sup>4</sup>*Institut de Biologie de l'ENS (IBENS), École normale supérieure, CNRS, INSERM, Université  
9 PSL, Paris, France*

10 \*Correspondence to be addressed to: [joelle.barido-sottani@m4x.org](mailto:joelle.barido-sottani@m4x.org)

11 **Running title:** Estimating the age of poorly dated fossils

## 12 **Abstract**

13 Bayesian total-evidence approaches under the fossilized birth-death model enable biologists to combine fossil and  
14 extant data while accounting for uncertainty in the ages of fossil specimens, in an integrative phylogenetic analysis.  
15 Fossil age uncertainty is a key feature of the fossil record as many empirical datasets may contain a mix of precisely  
16 dated and poorly dated fossil specimens or deposits. In this study, we explore whether reliable age estimates for  
17 fossil specimens can be obtained from Bayesian total-evidence phylogenetic analyses under the fossilized birth-death  
18 model. Through simulations based on the example of the Baltic amber deposit, we show that estimates of fossil  
19 ages obtained through such an analysis are accurate, particularly when the proportion of poorly dated specimens  
20 remains low and the majority of fossil specimens have precise dates. We confirm our results using an empirical  
21 dataset of living and fossil penguins by artificially increasing the age uncertainty around some fossil specimens and  
22 showing that the resulting age estimates overlap with the recorded age ranges. Our results are applicable to many  
23 empirical datasets where classical methods of establishing fossil ages have failed, such as the Baltic amber and the  
24 Gobi Desert deposits.

25 **Keywords:** fossilized birth-death, fossil age estimates, Bayesian phylogenetic inference, total-evidence

## 26 1 Introduction

27 Recent progress in statistical methods has enabled biologists to estimate the timing of speciation events in phylo-  
28 genies comprising both living and fossil taxa. These advances include likelihood-based models for discrete morpho-  
29 logical data—variants of the Mk model (Lewis, 2001)—that describe the substitution process for discrete character  
30 data, and thus allow for statistical inference of phylogenetic relationships from morphological matrices. When com-  
31 bined with models characterizing the distribution of substitution rates among branches (such as “relaxed clock”  
32 models like those described by Thorne et al., 1998; Drummond et al., 2006; Lepage et al., 2007, and many others),  
33 these advances led to the introduction of new Bayesian approaches for jointly estimating phylogenetic relation-  
34 ships and divergence times of datasets containing extant taxa and dated fossil specimens. Early applications of  
35 these Bayesian “total-evidence” dating analyses (Pyron, 2011; Ronquist et al., 2012a) did not adequately model the  
36 speciation-extinction-sampling process underlying the generation of a dated phylogenetic tree with sampled fossil  
37 and extant taxa (Pett and Heath, 2020). However, the serially sampled birth-death process introduced by Stadler  
38 (2010) was later integrated into Bayesian approaches for inferring time-calibrated phylogenies using more realistic  
39 models of diversification and sampling (Heath et al., 2014; Gavryushkina et al., 2014). This model is referred to  
40 as the fossilized birth-death (FBD) process when applied to datasets including information from the fossil record  
41 (Heath et al., 2014).

42 The FBD process describes the generation of a dated phylogenetic tree of sampled extant and fossil lineages,  
43 with parameters explicitly controlling for the extant sampling probability and the rates of speciation, extinction,  
44 and fossil recovery. This model can be combined with the morphological and clock models described above in  
45 a Bayesian statistical framework. Moreover, this integrative Bayesian framework allows researchers to combine  
46 paleontological information into phylogenetic analyses of living species, thus providing insights into the timing  
47 and rate of diversification in the tree of life. Importantly, total-evidence methods using the FBD model allow  
48 researchers to include a greater amount of the data observed from the fossil record, which, in turn, improves  
49 our understanding of macroevolutionary processes. Bayesian total-evidence methods and associated models are  
50 implemented in statistical tools like RevBayes (Höhna et al., 2016), BEAST2 (Bouckaert et al., 2014, 2019), and  
51 MrBayes (Ronquist et al., 2012b). With access to statistical software for more holistically integrating paleontological  
52 and neontological data, biologists have greatly improved our understanding of the evolutionary dynamics of various  
53 clades including monocots (Eguchi and Tamura, 2016), beetles (Gustafson et al., 2017), sponges (Schuster et al.,  
54 2018), vipers (Šmíd and Tolley, 2019), and termites (Jouault et al., 2021).

55 The fossil record is essential for calibrating species trees to time (*i.e.*, years or millions of years), as molecular  
56 sequences from extant species are informative about the relative age of species but do not typically provide in-  
57 formation about the absolute age (Pett and Heath, 2020). There are two main methods of determining a fossil’s  
58 age, namely relative dating and absolute dating. Relative fossil dating determines a specimen’s approximate age  
59 by comparing it to similar rocks and fossils with known ages. A fossil’s absolute date is obtained by applying

60 radiometric dating to measure the decay of isotopes, either within the fossil or, more often, the rocks associated  
61 with it ([Gradstein et al., 2012](#); [Peppe and Deino, 2013](#)). Accurate dates for fossil specimens and deposits are critical  
62 not only for understanding the timing of speciation events in the tree of life, but these dates also provide crucial  
63 data for answering questions in evolutionary biology, paleoecology, biogeography, and paleoclimatology. However,  
64 there are deposits and key specimens where traditional dating methods have failed and their ages remain uncertain.  
65 Uncertain dates for fossil specimens and formations, in turn, limit the scientific value of these observations.

66 One of the most famous examples of such a deposit is Baltic amber, a remarkable source of terrestrial invertebrate  
67 fossils (mostly insects) from the Eocene. There are several hypotheses concerning its age (for a summary see [Bogri  
68 et al., 2018](#)) and it is generally dated as Eocene, with a wide age range between 55 and 34 Ma. Difficulties in the  
69 age determination are due to the repeated re-deposition of the amber, the broad range of the ancient forest, and  
70 its probable existence for several million years. Another example where the age uncertainty hampers biological  
71 and geological studies is the Cretaceous terrestrial sediments in the Gobi Desert of Mongolia, a site renowned for  
72 remarkably well preserved vertebrate fauna, including dinosaurs. Unfortunately, a definitive age cannot be directly  
73 determined due to the lack of discrete key beds, like zircon-bearing tuffs ([Kurumada et al., 2020](#)). In some cases,  
74 even if the age range of a formation can be determined, other factors might hinder the assessment of a fossil's age.  
75 One example of such a deposit is the Daohugou Formation (164-159 Ma), which is well known for exceptionally  
76 complete fossils, including a diverse and rich record of invertebrates and plants, but also many vertebrates preserved  
77 with traces of soft tissues ([Wang et al., 2005](#)). However, due to the complicated stratigraphy of the formation, where  
78 several fossiliferous layers mix and overlap ([Li et al., 2021](#)), it is often difficult to assess a fossil's precise age without  
79 knowing the exact layer from which it was sampled.

80 Without sufficient direct evidence for dating critical deposits and specimens, scientists must rely on approaches  
81 that harness the information in indirect evidence. Bayesian total-evidence approaches make it possible to directly  
82 integrate the age uncertainty around historic samples into Bayesian analyses ([Shapiro et al., 2011](#)) and previous  
83 work has shown that adequately representing this uncertainty is critical to obtaining accurate phylogenies and  
84 divergence times estimates ([Barido-Sottani et al., 2019a, 2020b](#)). However, most phylogenetic divergence-time  
85 analyses typically treat fossil ages as nuisance parameters and the uncertainty associated with those observations is  
86 simply a source of error. Nevertheless, the ages of heterochronous specimens may be particularly interesting for some  
87 types of phylogenetic studies. [Shapiro et al. \(2011\)](#) note that datasets of infectious diseases or those that include  
88 ancient DNA sequences may have samples with unknown ages, and robust estimates of these undated samples can  
89 help shed light on the dynamics of viral epidemics or the ecological contexts of sub-fossils used in ancient DNA  
90 research. Their simulations and empirical validations show that phylogenetic analyses of datasets including a single  
91 undated sample can yield accurate estimates of the unknown sampling time ([Shapiro et al., 2011](#)). More recently,  
92 [Drummond and Stadler \(2016\)](#) extended this study to consider much older time-scales and total-evidence analyses  
93 of fossil and extant species under the fossilized birth-death model. Their study focused on analyses of fossil-rich

94 empirical datasets and demonstrated that the age estimated for a single fossil specimen with an unknown date  
95 is accurate when using this integrative Bayesian approach (Drummond and Stadler, 2016). While these previous  
96 studies indicate that combining data from extant and fossil taxa can lead to accurate age estimates for poorly  
97 dated fossils, they did not consider the patterns of age uncertainty frequently associated with the fossil record.  
98 Paleontological datasets can often include collections of fossils all sampled from the same poorly dated formation  
99 or multiple fossils with incomplete or disputed provenance, making it difficult to assign an accurate date.

100 In this study, we investigate the performance of Bayesian phylogenetic approaches using the FBD model, applied  
101 to datasets that include multiple fossils from poorly dated formations. We use simulations to evaluate the accuracy  
102 and robustness of the age estimates for fossils belonging to the uncertain formation, and explore whether the  
103 presence of poorly dated fossils affects the estimates of the tree topology and the ages of the other, well dated  
104 fossils. We use a recently published dataset of extant and fossil penguins (order Sphenisciformes) from Thomas  
105 et al. (2020) to validate this approach on empirical data. Fossil penguin specimens have relatively precise dates,  
106 allowing us to compare the age estimates obtained when artificially increasing the age uncertainty around some  
107 selected fossils to ages observed and recorded from the fossil record.

## 108 2 Methods

### 109 2.1 Simulated data and analyses

110 We evaluated the accuracy and precision of fossil specimen age estimates using simulated datasets. We calibrated the  
111 model and parameters used for simulation based on an empirical dataset of the subfamily Paederinae of rove beetles  
112 (Staphylinidae, Coleoptera). This subfamily has a strikingly rich fossil record in Cenozoic deposits, including several  
113 fossil specimens from one of the best known poorly dated insect deposits, Baltic amber (DŽ, personal observations),  
114 making rove beetles well suited for providing realistic values for our simulations.

#### 115 2.1.1 Simulated phylogenies and taxon sampling

116 Trees were simulated under a birth-death process using the R package `TreeSim` (Stadler, 2011), starting from one  
117 lineage at the origin time of 120 Myr, with the speciation rate set to  $\lambda = 0.05/\text{Myr}$  and the extinction rate to  
118  $\mu = 0.02/\text{Myr}$ . Speciation and extinction rates were selected based on estimates for the Staphylininae subfamily  
119 of rove beetles, from Brunke et al. (2017). For each simulation condition, 100 replicates were simulated. The  
120 extant sampling probability was set to  $\rho = 0.5$ . In order to keep the trees computationally manageable, we based  
121 the number of tips based on the number of genera currently classified into Paederinae (A. Newton, unpublished  
122 database). Thus we rejected trees which had less than 20 or more than 30 extant samples.

123 In our setup, we assume that the unknown deposit is likely tied to a geographical or ecological factor affecting  
124 the corresponding lineages. Thus to sample fossils, we first assigned all lineages present in the complete tree falling

125 within the 30 and 50 Myr interval to a binary character, using a continuous rate transition process where all lineages  
126 started in state 1 at age=50 and transitioned from state 1 to 2 with rate  $q_{1,2}$  and back with rate  $q_{2,1}$ . All lineages  
127 occurring outside of the 30 – 50 interval were assigned to state 1. We then sampled fossils using the R package  
128 **FossilSim** (Barido-Sottani et al., 2019b), following a Poisson process with piece-wise constant rates  $\psi_{int}$  between  
129 30 and 50, and  $\psi_{bg}$  outside of this interval. Fossil samples in state 1, designated as “precise-date” fossils, were  
130 considered to be individual samples, while fossil samples in state 2, designated as “imprecise-date” fossils, were  
131 assigned to all occur within the same poorly dated deposit. Transition and fossilization rates were calibrated to  
132 obtain specific proportions (0.1, 0.3 or 0.5) of imprecise-date samples among all fossils. The detailed values used  
133 are shown in Table 1. Simulations were rejected if the resulting proportion was more than 10% different from the  
134 target proportion, or if the total number of fossil samples was not between 45 and 55. Note that in order to obtain  
135 the target proportions, a higher sampling rate had to be used during the interval of sampling imprecise-date fossils  
136 compared to the rest of the timeline.

| Target proportion of<br>imprecise-date fossils | $q_{1,2}$ | $q_{2,1}$ | $\psi_{bg}$ | $\psi_{int}$ |
|------------------------------------------------|-----------|-----------|-------------|--------------|
| 0.1                                            | 0.6       | 0.7       | 0.03        | 0.04         |
| 0.3                                            | 0.8       | 0.5       | 0.02        | 0.08         |
| 0.5                                            | 1.0       | 0.4       | 0.01        | 0.15         |

Table 1: Parameter values used to simulate the fossil sampling process.

137 An example of a complete simulated tree with fossil samples is shown in Figure S4. To simulate fossil age  
138 uncertainty, all fossil samples were assigned a range of possible ages, depending on their state. Imprecise-date  
139 fossils were all assigned the same age range of 30 to 50 Myr, and precise-date fossils were assigned a range of fixed  
140 length 0.1, 0.2 or 0.3 times the true age of the fossil. The minimum age of each range was sampled uniformly so  
141 that the true age of the fossil always lied within its corresponding range.

### 142 2.1.2 Molecular sequence alignment and morphological character matrix simulation

143 Molecular sequences were simulated for the extant samples using **seq-gen** (Rambaut and Grassly, 1997) via the R  
144 package **phyclust** (Chen, 2011). We simulated sequences comprising 4,500 nucleotides under an HKY+ $\Gamma$  model  
145 with five rate categories and a gamma shape value of  $\alpha = 0.35$ . As the inference of the phylogenetic tree from  
146 molecular data was not the focus of this study, we used a simple strict molecular clock, with a clock rate set to 0.05  
147 substitutions/Myr, based on estimates of the clock rate from Brunke et al. (2017).

148 Morphological alignments were simulated for both extant and extinct samples using the R package **geiger**  
149 (Pennell et al., 2014). We simulated matrices of 120 characters under an Mk model (Lewis, 2001) with five rate  
150 categories, selecting only varying characters. The number of states in the simulated matrices varied such that 70%  
151 of simulated characters were binary, 20% ternary, and 10% quaternary. The morphological clock rate was set to 0.1  
152 substitutions/Myr, following an estimate for Chrysomelidae and Cerambycidae from Farrell and Sequeira (2004).

153 We assigned a random proportion of 5% of the simulated morphological characters as “soft” characters, which were  
154 only represented in extant taxa and were assigned the unknown character “?” for all fossil samples, thus emulating  
155 biased character preservation.

### 156 2.1.3 Bayesian inference

157 For each simulated dataset, we performed a Bayesian total-evidence analysis in RevBayes (Höhna et al., 2016) under  
158 a constant-rate FBD tree prior. The constant-rate FBD model is used in most empirical studies, as time-dependent  
159 variation in rates is often difficult to know *a priori*. Priors for the speciation, extinction, and fossilization rates were  
160 set to Exponential(10). The ages of the fossils were sampled along with the other parameters, with a prior set as  
161 uniform over their simulated range, as described in Drummond and Stadler (2016). The extant sampling proportion  
162 was fixed to the true value,  $\rho = 0.5$ . Moves were set in accordance with guidance from the RevBayes FBD tutorial  
163 (Barido-Sottani et al., 2020a, also see: [https://revbayes.github.io/tutorials/fbd/fbd\\_specimen.html](https://revbayes.github.io/tutorials/fbd/fbd_specimen.html)). The  
164 substitution and clock models were set to the simulation models. The parameters of these models were estimated,  
165 using priors and moves also set following the RevBayes FBD tutorial. The full Rev scripts used for inference are  
166 available in the Supplementary Materials. Analyses in RevBayes were run for up to 150,000,000 generations, and two  
167 independent chains were run in for each replicate. Samples from each run were assessed in Tracer (Rambaut et al.,  
168 2018). We considered that the Markov chain had reached stationarity and converged on the target distribution if  
169 the effective sample size (ESS) of the posterior had reached a value  $> 200$  and if both chains had median posteriors  
170 which differed by no more than 10%. We did not assess the convergence of the tree topology. Some simulation  
171 replicates (0 to 12 depending on the dataset, out of 100) failed to converge and were discarded from the final results.

### 172 2.1.4 Assessing results

173 We assessed the accuracy of the fossil age estimates by measuring the relative error of the posterior estimates,  
174 defined as the absolute difference between the true value and the estimated value, divided by the true value. We  
175 also calculated the coverage, *i.e.*, the proportion of analyses in which the true parameter value was included in the  
176 95% highest posterior density (HPD) interval. These measures were averaged separately over all imprecise-date and  
177 precise-date fossils.

178 To assess the accuracy of inferred topologies we calculated the mean normalized Robinson-Foulds (RF) distance  
179 (Robinson and Foulds, 1981) between the true simulated trees, including the fossil samples, and the tree samples  
180 from the posterior distribution. The RF distance only depends on the topology of the trees. The normalized  
181 RF distance between two trees with  $n$  tips is computed by dividing the RF distance between these trees by the  
182 maximum possible RF distance between two trees with  $n$  tips, thus scaling the distances between 0 and 1. Finally,  
183 we assessed the accuracy of the positioning of fossils on the inferred tree topologies by calculating the proportion  
184 of posterior samples in which a given fossil was placed in the correct extant clade.

## 185 2.2 Validation using empirical data

186 We used a recently published study of penguins by [Thomas et al. \(2020\)](#) to demonstrate how Bayesian phylogenetic  
187 analyses can improve the precision of poorly dated fossil specimens using an empirical dataset. This dataset is a  
188 useful “ground truth” for fossil age estimation because the extant diversity of penguins is completely sampled, which  
189 minimizes the effect of potential sampling biases in the analysis. Moreover, the majority of fossils in this dataset  
190 are precisely dated (age ranges of 1.5 to 10 My) and the penguin fossil record is generally considered reliable.

191 We used the molecular and morphological data matrices of living and fossil Sphenisciformes published in [Thomas](#)  
192 [et al. \(2020\)](#), which include recently published sequences from [Cole et al. \(2019\)](#) and extend the morphological matrix  
193 by [Degrange et al. \(2018\)](#). The molecular sequence alignment contains mitochondrial genome sequences of 15,755  
194 nucleotides for 24 extant taxa, and the morphological matrix is composed of 274 characters for 66 extant and fossil  
195 species. We focused our study on the estimated ages of fossil taxa while marginalizing over the tree topology (for  
196 the tree topology see figure 2 in [Thomas et al., 2020](#)).

197 The observed age ranges for all fossil species were obtained from [Thomas et al. \(2020\)](#). We imposed a poorly  
198 dated fossil deposit on this dataset by assigning an identical large age range to selected fossil species. The observed  
199 age range of the fossils was always fully included in the assigned age range. Unlike the simulated dataset, we did  
200 not use the age range of the Baltic amber deposit. Instead, we selected three age intervals which covered the age  
201 ranges of approximately the same number of species, but were of different length. The first interval, denoted as  
202 “small”, ranged from 30.3 Ma to 46.8 Ma and contained 14 fossil species. The second interval, denoted as “large”,  
203 ranged from 14.6 Ma to 44.6 Ma and contained 15 fossil species. We also tested an extension of the first interval,  
204 which ranged from 25.2 Ma to 61.5 Ma and contained 22 fossil species. For each interval, two conditions were  
205 tested: (1) a random subsample of 50% of the species were assigned the full interval as age range, while the other  
206 species were assigned their observed ranges; and (2) all fossil species in the interval were assigned the full interval  
207 as their age range. In contrast to the simulation setup, the assignment of fossils to the unknown deposit was not  
208 tied to a phylogenetic character. The full prior age ranges set for each fossil and each configuration is shown in  
209 Figures S8-S10.

### 210 2.2.1 Bayesian inference

211 We performed the phylogenetic analyses in RevBayes ([Höhna et al., 2016](#)). With the exception of the age ranges,  
212 which were modified as described in above, all models and priors were identical to the analysis in [Thomas](#)  
213 [et al. \(2020\)](#), which also used the RevBayes FBD tutorial as a guide ([Barido-Sottani et al., 2020a](#), also see:  
214 [https://revbayes.github.io/tutorials/fbd/fbd\\_specimen.html](https://revbayes.github.io/tutorials/fbd/fbd_specimen.html)). All fossil ages were assigned a uniform prior  
215 distribution over their age range. Priors for the speciation, extinction, and fossilization rates were set to Exponen-  
216 tial(10). The molecular alignment used a *GTR* +  $\Gamma$  substitution model with 4 rate categories, in combination with  
217 an uncorrelated exponential clock model with a prior of Exponential(10) on the mean clock rate. The morpholog-

218 ical alignment used an Mk substitution model (Lewis, 2001) with 4 rate categories, in combination with a strict  
219 clock model with a prior of Exponential(1) on the clock rate. The inference was run for 137,000,000 iterations.  
220 Convergence was assessed in Tracer (Rambaut et al., 2018) using the criteria described above for the simulation  
221 analyses.

## 222 3 Results

### 223 3.1 Simulated datasets

224 Results from our analyses of the simulated datasets are shown in Figures 1 and 2. As expected, the relative error on  
225 age estimates is much higher for imprecise-date fossils than for precise-date fossils. The proportion of imprecise-date  
226 fossils has a strong impact on the accuracy of fossil age estimates, with the mean coverage for the estimated age of  
227 imprecise-date fossils ranging from  $\approx 65\%$  when 10% of the fossils are poorly dated, to only  $\approx 30\%$  when 50% of  
228 the fossils are poorly dated. However, the absolute relative error remains quite low for imprecise-date fossils even  
229 in the worst case scenario, indicating that the inference is able to recover approximate age estimates for fossils from  
230 poorly dated deposits, despite the decreased coverage. The width of the age range associated with precise-date  
231 fossils, which corresponds to the magnitude of the age uncertainty on those fossils, has a strong impact on the  
232 accuracy of the age estimates for well dated fossils, but little effect on the estimates for imprecise-date fossils. This  
233 holds true even in the datasets where the relative age range for precise-date fossils is 30%, and the oldest precise-date  
234 fossils are associated with more age uncertainty than imprecise-date fossils. One likely reason for this is that older  
235 fossils are relatively rare in our simulated datasets, for instance only  $\approx 15\%$  of the total number of fossils are older  
236 than 60My.

237 The widths of the 95% HPD intervals for imprecise-date fossils are smaller than the time interval of the prior age  
238 range in all tested conditions, showing that the age estimates of imprecise-date fossils are not driven only by this  
239 prior (Fig. 2C). Interestingly, the HPD interval widths decrease with higher proportions of imprecise-date fossils,  
240 while the estimates show decreased accuracy and coverage in this situation. This is contrary to the expected pattern,  
241 which would be that interval widths increase with larger amounts of uncertainty in the data, but that coverage levels  
242 remain similar. One likely explanation is that our simulations used a piece-wise constant sampling rate, in violation  
243 of the inference model which assumes that all FBD rates are constant across time and lineages. In addition, the  
244 discrepancy between the low and high fossil sampling rate increased with the proportion of imprecise-date fossils.  
245 It is also likely that the impact of model violation on the estimates is stronger in datasets with lower amounts of  
246 data. The combination of these two factors leads the datasets with high proportions of fossils with imprecise dates  
247 to exhibit narrower than expected HPD intervals and decreased coverage.

248 The topology inference follows a similar pattern, as the proportion of correct fossil positions decreases and  
249 the average RF distance increases with increasing age uncertainty or higher proportions of poorly dated fossils



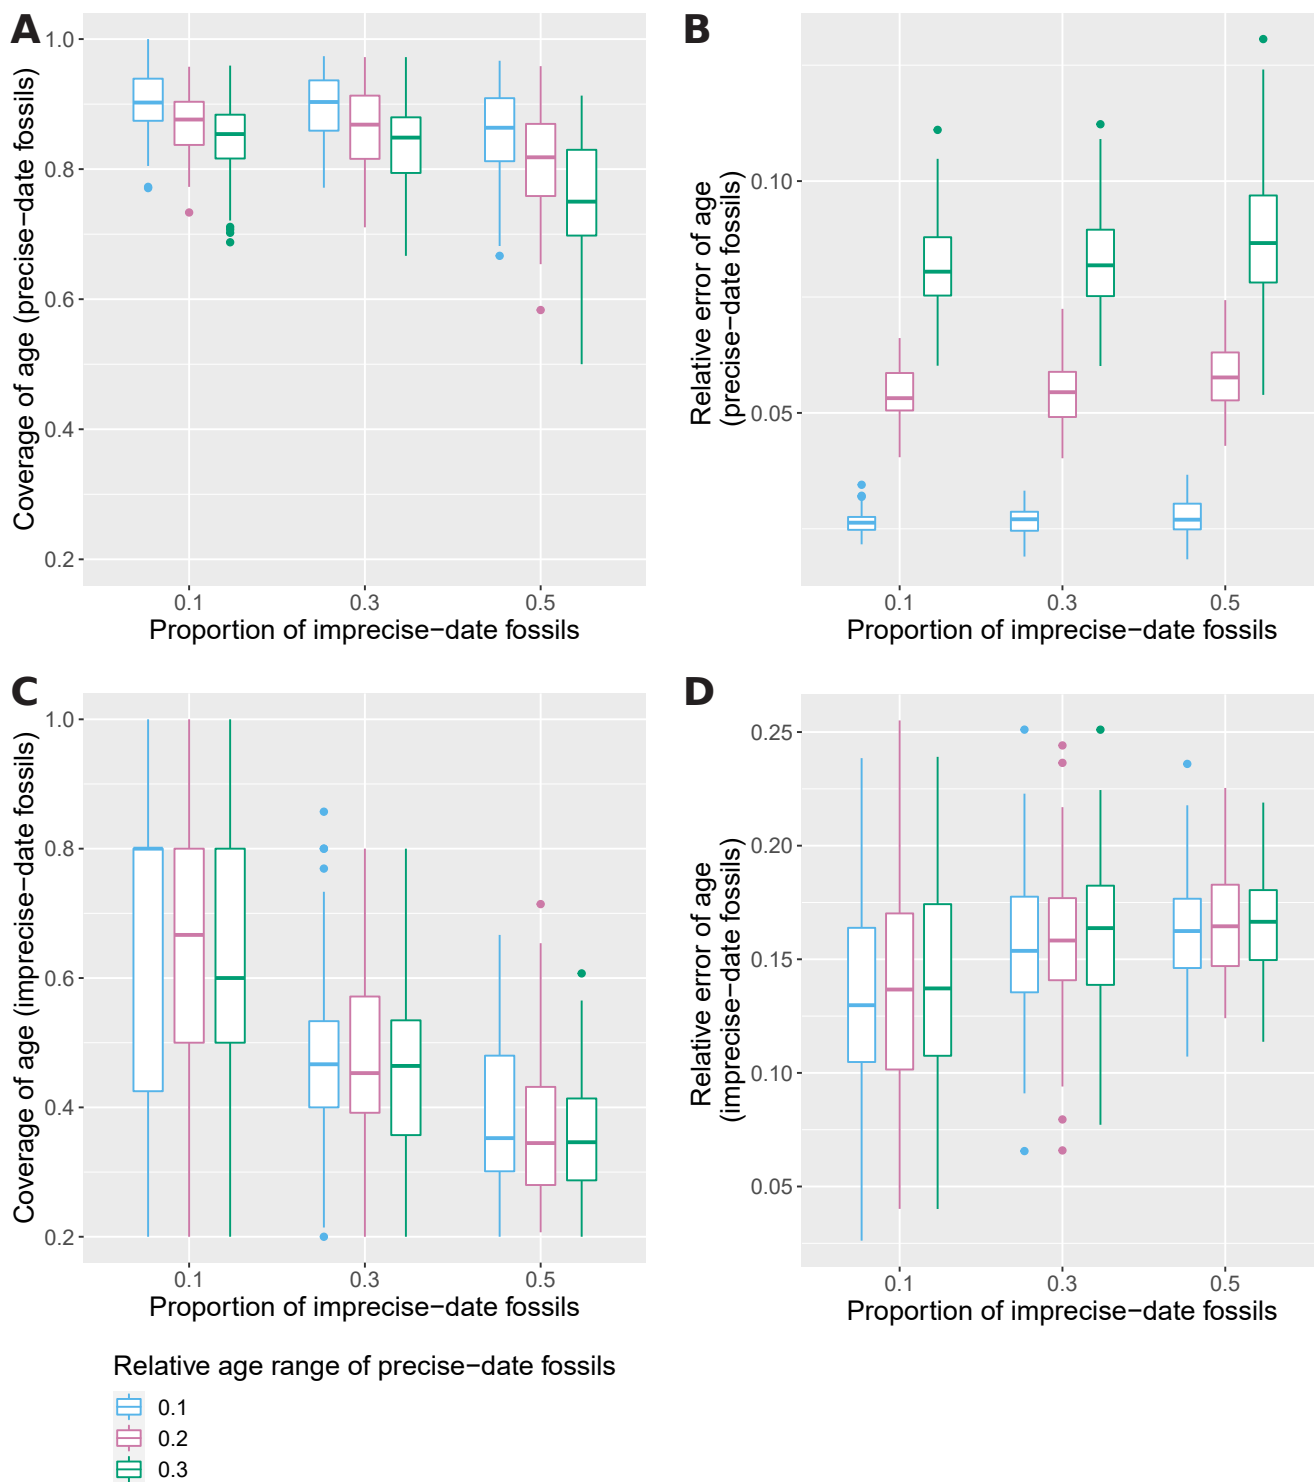

Figure 1: Relative error of the median age estimate (B,D) and 95% HPD coverage (A,C) of precise-date fossils (A,B) and imprecise-date fossils (C,D) for different proportions of imprecise-date fossils, and different widths of the age range of precise-date fossils. Measures are averaged over all fossils for each replicate. The average and standard deviation across all replicates is shown.

250 (Fig. 2D). The positions of precise-date fossils are more accurate than the positions of imprecise-date fossils, which  
 251 confirms that fossil ages are an important source of information for both topology and branch times in total-evidence

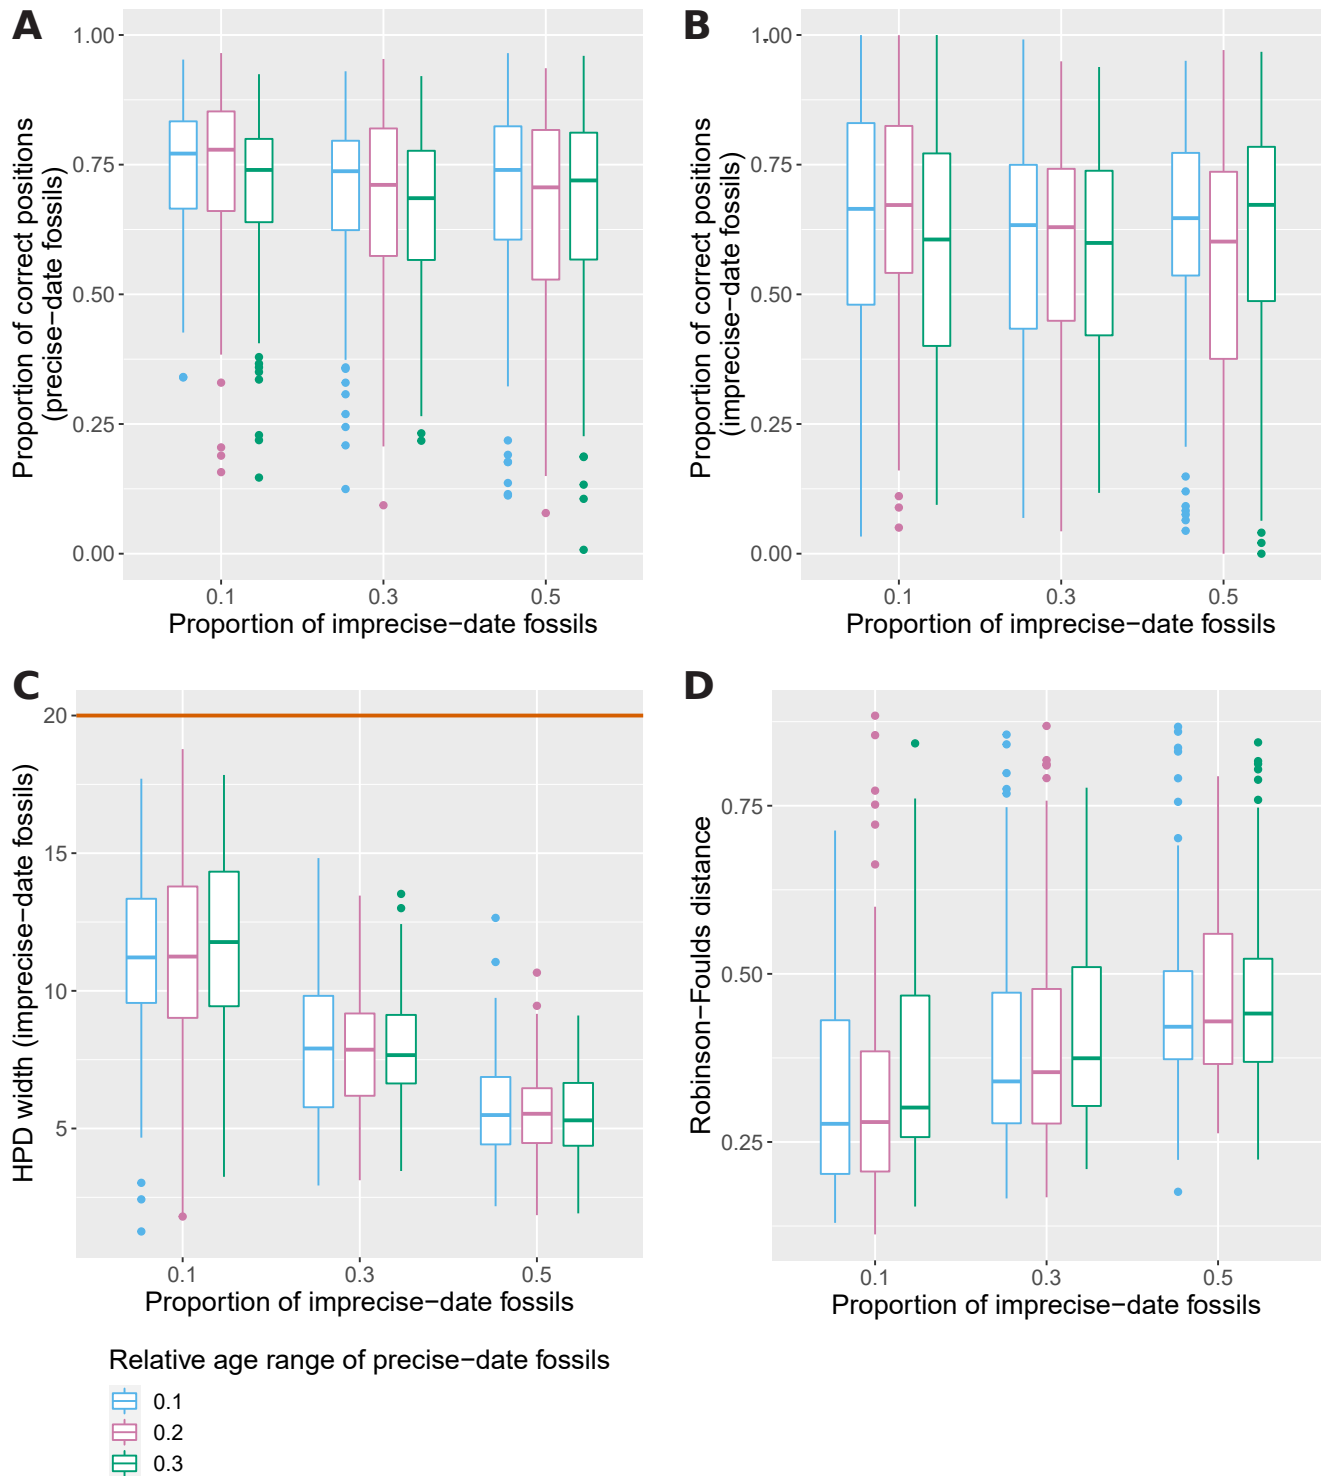

Figure 2: Proportion of posterior samples with correctly placed fossils, averaged across all precise-date fossils (A) or all imprecise-date fossils (B), width of the 95% HPD interval averaged across all imprecise-date fossils (C) and mean normalized RF distance between estimated trees and simulated tree (D), for different proportions of imprecise-date fossils and different widths of the age range of precise-date fossils. The average and standard deviation across all replicates is shown. The brown line in C shows the size of the age range set as the prior for all imprecise-date fossils (*i.e.*, 20Myr).

252 analyses. In all tested conditions, the average proportion of correct fossil positions is >50% for both precise- and  
253 imprecise-date fossils.

## 254 3.2 Empirical dataset

255 Figure 3 shows the results of the analysis on the penguin datasets, using either the small or the large interval as  
256 deposit. When only 50% of the fossils in the interval are given imprecise dates (Fig. 3A and C), there is a large  
257 overlap between the estimated posterior distributions of fossil ages and the empirical intervals. As expected, the  
258 overlap decreases when all fossils in the interval have imprecise dates and less information is available in the dataset  
259 (Fig. 3B and D). In this case, some posterior distributions diverge completely from the recorded interval (Fig. 3D,  
260 *Paraptenodytes antarcticus*), or appear to be driven mostly by the prior (Fig. 3B, *Delphinornis arctowski*).

261 The results concerning the extended version of the first interval are shown in the supplementary materials, and  
262 show similar patterns to the large interval. Overall, these results confirm that the age of the well dated fossils, in  
263 combination with the tree, allows us to estimate the age of poorly dated fossils, and that the presence and number  
264 of these well dated fossils plays a key role in the accuracy of the resulting estimates.

## 265 4 Discussion

266 While phylogenetic analyses using the FBD model have largely focused on inferring phylogenetic trees and dating  
267 species divergences, our study shows that these methods can harness indirect information in an integrative and  
268 hierarchical model to improve date estimates for fossil specimens themselves. This is also the case when the dataset  
269 includes a collection of poorly dated fossils that all come from the same formation. This showcases one of the  
270 strengths of the FBD process as a complete model integrating both diversification and fossil recovery processes.

271 Our study examines the accuracy of age estimates for a combination of poorly dated fossils from the same deposit  
272 and more credible fossils from well dated deposits. We show that when these fossil taxa are integrated with extant  
273 species in a joint analysis of discrete morphological characters (fossil and extant) and molecular sequences (extant  
274 only), it is possible to infer the ages of fossil samples from a deposit with a large age uncertainty. As expected,  
275 the accuracy of the fossil age inference is strongly impacted by the amount of uncertainty and missing information  
276 present in the analysis, which is represented in our study by the relative proportion of fossils with uncertain dates  
277 versus those with precise dates, as well as the magnitude of the age uncertainty associated with well dated fossils.  
278 Finally, we also demonstrate that the extant topology and the overall age of the phylogeny are well estimated in  
279 all datasets, which shows that FBD total evidence analyses can provide reliable estimates despite including fossils  
280 with large amounts of age uncertainty.

281 It is important to note that our simulations represent an idealized scenario, chosen to reduce model complexity  
282 and the noise of the parameters under examination, and to focus specifically on fossil age estimates. In particular,

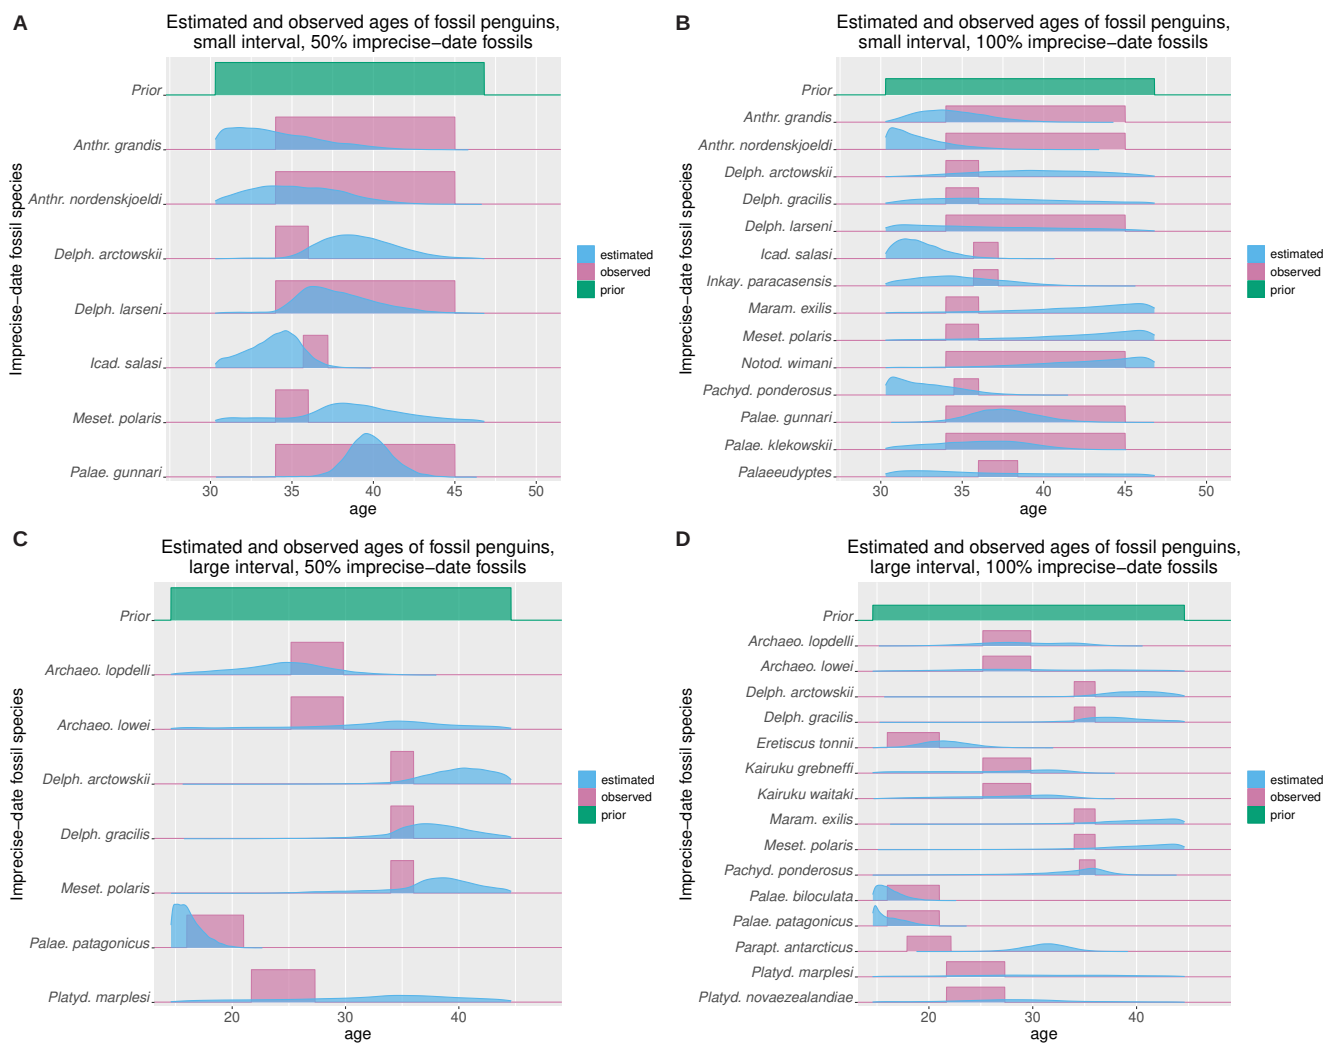

Figure 3: Comparison of observed (pink) and estimated (blue) penguin ages for the small (A,B) and large (C,D) intervals, with a proportion of 0.5 (A,C) or 1 (B,D) of imprecise-date fossils. The observed age range is shown as a uniform distribution, while the estimated age is the inferred posterior distribution. The uniform distribution used as prior for the imprecise-date fossils is shown in green on each panel.

283 we used a strict clock for both the molecular and the morphological alignments, which is likely to be unrealistic  
 284 for large empirical datasets. As shown in the supplementary materials, using a relaxed clock for the molecular  
 285 alignment did not significantly affect our results, but also led to convergence issues, particularly in combination  
 286 with high proportions of imprecise-date fossils. Using a relaxed clock for the morphological alignment also led to  
 287 reduced sampling efficiency and poor convergence. In general, we expect that increasing the complexity of the  
 288 model can induce long mixing times for the Markov chain Monte Carlo (MCMC) sampler and in some cases lead  
 289 to non-convergence. One potential way to reduce complexity would be to assign the same age to all imprecise-  
 290 date fossils, rather than estimating all fossil ages independently as we did. However, this assumes that all fossils  
 291 from the deposit were sampled at very similar dates, rather than the deposit being the product of a continuous  
 292 fossilization process over an extended period of time. In practice, it may be difficult to distinguish between these  
 293 two hypotheses *a priori*. The Baltic amber deposit, which we use as the basis for our simulation parameters, is

294 particularly challenging in this respect. This deposit is an umbrella term for various secondary amber deposits  
295 found around the Baltic Sea. It remains unclear whether amber found in the different regions originated in a single  
296 or in multiple areas. The north European Eocene forest covered a substantial area of many square kilometres and  
297 amber forests in the Baltic region could have persisted for several million years up to the end of the Eocene (for a  
298 summary see [Bogri et al., 2018](#)).

299 Poor mixing and convergence issues are particularly problematic when a complex, parameter-rich model is  
300 applied to a dataset with large amounts of missing data. As a result, we expect that this approach may perform  
301 less well than our simulated results on more complex empirical datasets, and in some cases may not converge at  
302 all without careful attention to the MCMC proposal algorithms. We believe that this is inevitable due to the  
303 challenges of working with missing data. Other ways to reduce uncertainty and complexity may be used, such  
304 as topological constraints which use taxonomic information to place fossil samples in particular clades, instead  
305 of relying purely on the morphological data and fossil ages to inform the inference of the tree topology. These  
306 constraints are particularly helpful in datasets where available morphological matrices are small (< 50 characters),  
307 since previous work has shown that small morphological matrices lead to high levels of inaccuracy in topology  
308 estimates ([Barido-Sottani et al., 2020b](#)). In addition, one advantage of using a Bayesian approach is that estimates  
309 will accurately represent the amount of uncertainty present in the dataset under a given model, including cases  
310 where the amount of uncertainty is too large to draw exploitable conclusions. However, this is only true if the  
311 inference model matches with the true evolutionary process, or in our case, with the simulation model.

312 One likely contributor to the decrease in accuracy when the proportion of imprecise-date fossils increases is that  
313 our inferences assumed uniform fossil sampling rates throughout the tree, an assumption which was increasingly  
314 violated when the proportion of fossils coming from the same deposit increased. The assumption of uniform sampling  
315 is very uncommon in existing empirical analyses, however our results show that using this assumption when a large  
316 proportion of fossils come from the same deposit can lead to biases in the inference. Therefore, we advise empirical  
317 studies to pay attention to the time and spatial distribution of the included fossils, and to use the skyline FBD  
318 model ([Stadler et al., 2013](#); [Zhang et al., 2016](#)) if time-varying rates are a likely factor.

319 Understanding the performance of statistical phylogenetic methods under realistic conditions is especially critical  
320 for methods applied to paleontological data. The structure and complexity of the geologic record ([Holland, 2016](#))  
321 as well as the challenges associated with collecting and curating fossils that may lead to uncertainty in a specimen's  
322 age, collection locale, or identification are all common realities faced by researchers working with fossils. Thus, new  
323 phylogenetic models that account for the way that taxa are sampled (*e.g.*, [Höhna et al., 2011](#)) or how fossil data  
324 are influenced by the structure of the rock record (*e.g.*, [Stadler et al., 2018](#)) will be important for improving our  
325 understanding of the geological and ecological context of lineage diversification through time.

326 In conclusion, we show that total-evidence phylogenetic analyses under a fossilized birth-death process can  
327 improve the precision of age estimates for fossils sampled from poorly dated geologic formations when combined

328 with character data and other information from extant taxa and other well dated fossil species. This approach may  
329 be useful for empirical datasets where the majority of fossils are precisely dated, but some specimens are sampled  
330 from a deposit with uncertain dates, *e.g.*, the Baltic amber deposit for insects (such as the rove beetles used as  
331 a model in our study) or the Gobi Desert deposit for dinosaurs. Such analyses are easily extended to include  
332 other processes present in empirical data, such as diversified sampling of extant taxa (Höhna *et al.*, 2011), which  
333 accounts for taxonomy-guided sampling strategies where only a single representative per genus or family is included  
334 in a dataset. However, because the accuracy of parameter estimates may be reduced when such complex models  
335 are used in analyses of highly incomplete datasets, researchers applying these methods to estimate fossil ages are  
336 encouraged to consider ways where they can minimize uncertainty and increase sampled data. Importantly, for some  
337 taxonomic groups, this may require more support and time for efforts to collect, curate, and analyze paleontological  
338 data.

## 339 Acknowledgements

340 We thank R. Warnock and J. Satler for helpful comments on this manuscript. We are grateful to A. Brunke for  
341 sharing his files from the Staphylininae dating analysis. JBS and TAH were supported by funds from the National  
342 Science Foundation (USA), grants DBI-1759909 and DEB-1556615. This project has received funding from the  
343 European Union's Horizon 2020 Research and Innovation Programme under the Marie Skłodowska-Curie grant  
344 agreement No. 797823 (postdoctoral fellowship of DŽ) and No. 101022928 (postdoctoral fellowship of JBS). All  
345 analyses were conducted using the Nova cluster, part of the Iowa State University High Performance Computing  
346 resources.

## 347 Data availability

348 The R scripts used for simulation, post-processing and plotting, the Rev scripts used for running the inference, as  
349 well as the simulated and empirical data files are available as a Zenodo repository, DOI: [10.5281/zenodo.6902473](https://doi.org/10.5281/zenodo.6902473).

## References

- 350
- 351 Barido-Sottani, J., G. Aguirre-Fernández, M. J. Hopkins, T. Stadler, and R. Warnock. 2019a. Ignoring stratigraphic  
352 age uncertainty leads to erroneous estimates of species divergence times under the fossilized birth-death process.  
353 *Proceedings of the Royal Society B: Biological Sciences* 286:20190685.
- 354 Barido-Sottani, J., J. A. Justison, A. M. Wright, R. C. Warnock, W. Pett, and T. A. Heath. 2020a. Estimating a  
355 time-calibrated phylogeny of fossil and extant taxa using RevBayes. Pages 5.2:1–5.2:23 *in* *Phylogenetics in the*  
356 *Genomic Era* (C. Scornavacca, F. Delsuc, and N. Galtier, eds.). No commercial publisher | Authors open access  
357 book.
- 358 Barido-Sottani, J., W. Pett, J. E. O'Reilly, and R. C. Warnock. 2019b. FossilSim: an R package for simulating  
359 fossil occurrence data under mechanistic models of preservation and recovery. *Methods in Ecology and Evolution*  
360 10:835–840.
- 361 Barido-Sottani, J., N. M. van Tiel, M. J. Hopkins, D. F. Wright, T. Stadler, and R. C. Warnock. 2020b. Ignoring  
362 fossil age uncertainty leads to inaccurate topology and divergence time estimates in time calibrated tree inference.  
363 *Frontiers in Ecology and Evolution* 8:183.
- 364 Bogri, A., A. Solodovnikov, and D. Żyła. 2018. Baltic amber impact on historical biogeography and palaeocli-  
365 mate research: Oriental rove beetle *Dysanabatium* found in the Eocene of Europe (Coleoptera, Staphylinidae,  
366 Paederinae). *Papers in Palaeontology* 4:433–452.
- 367 Bouckaert, R., J. Heled, D. Kühnert, T. Vaughan, C.-H. Wu, D. Xie, M. A. Suchard, A. Rambaut, and A. J.  
368 Drummond. 2014. BEAST 2: A software platform for Bayesian evolutionary analysis. *PLoS Computational*  
369 *Biology* 10:e1003537.
- 370 Bouckaert, R., T. G. Vaughan, J. Barido-Sottani, S. Duchêne, M. Fourment, A. Gavryushkina, J. Heled, G. Jones,  
371 D. Kühnert, N. De Maio, et al. 2019. BEAST 2.5: An advanced software platform for Bayesian evolutionary  
372 analysis. *PLoS Computational Biology* 15:e1006650.
- 373 Brunke, A. J., S. Chatzimanolis, B. D. Metscher, K. Wolf-Schwenninger, and A. Solodovnikov. 2017. Dispersal  
374 of thermophilic beetles across the intercontinental Arctic forest belt during the early Eocene. *Scientific Reports*  
375 7:12972.
- 376 Chen, W.-C. 2011. Overlapping Codon Model, Phylogenetic Clustering, and Alternative Partial Expectation Con-  
377 ditional Maximization Algorithm. Ph.D. thesis Iowa State University.
- 378 Cole, T. L., D. T. Ksepka, K. J. Mitchell, A. J. Tennyson, D. B. Thomas, H. Pan, G. Zhang, N. J. Rawlence, J. R.  
379 Wood, P. Bover, et al. 2019. Mitogenomes uncover extinct penguin taxa and reveal island formation as a key  
380 driver of speciation. *Molecular Biology and Evolution* 36:784–797.

- 381 Degrange, F. J., D. T. Ksepka, and C. P. Tambussi. 2018. Redescription of the oldest crown clade penguin: Cranial  
382 osteology, jaw myology, neuroanatomy, and phylogenetic affinities of *Madrynornis mirandus*. *Journal of Vertebrate*  
383 *Paleontology* 38:e1445636.
- 384 Drummond, A. J., S. Y. Ho, M. J. Phillips, and A. Rambaut. 2006. Relaxed phylogenetics and dating with confi-  
385 dence. *PLoS Biology* 4:e88.
- 386 Drummond, A. J. and T. Stadler. 2016. Bayesian phylogenetic estimation of fossil ages. *Philosophical Transactions*  
387 *of the Royal Society B: Biological Sciences* 371:20150129.
- 388 Eguchi, S. and M. N. Tamura. 2016. Evolutionary timescale of monocots determined by the fossilized birth-death  
389 model using a large number of fossil records. *Evolution* 70:1136–1144.
- 390 Farrell, B. D. and A. S. Sequeira. 2004. Evolutionary rates in the adaptive radiation of beetles on plants. *Evolution*  
391 58:1984–2001.
- 392 Gavryushkina, A., D. Welch, T. Stadler, and A. J. Drummond. 2014. Bayesian inference of sampled ancestor trees  
393 for epidemiology and fossil calibration. *PLoS Computational Biology* 10:e1003919.
- 394 Gradstein, F. M., J. G. Ogg, M. D. Schmitz, and G. M. Ogg. 2012. *The Geologic Time Scale 2012*. Elsevier.
- 395 Gustafson, G. T., A. A. Prokin, R. Bukontaite, J. Bergsten, and K. B. Miller. 2017. Tip-dated phylogeny of whirligig  
396 beetles reveals ancient lineage surviving on Madagascar. *Scientific Reports* 7:1–9.
- 397 Heath, T. A., J. P. Huelsenbeck, and T. Stadler. 2014. The fossilized birth-death process for coherent calibration  
398 of divergence-time estimates. *Proceedings of the National Academy of Sciences of the United States of America*  
399 111:E2957–66.
- 400 Höhna, S., M. J. Landis, T. A. Heath, B. Boussau, N. Lartillot, B. R. Moore, J. P. Huelsenbeck, and F. Ronquist.  
401 2016. RevBayes: Bayesian phylogenetic inference using graphical models and an interactive model-specification  
402 language. *Systematic Biology* 65:726–736.
- 403 Höhna, S., T. Stadler, F. Ronquist, and T. Britton. 2011. Inferring speciation and extinction rates under different  
404 sampling schemes. *Molecular Biology and Evolution* 28:2577–2589.
- 405 Holland, S. M. 2016. The non-uniformity of fossil preservation. *Philosophical Transactions of the Royal Society B:*  
406 *Biological Sciences* 371:20150130.
- 407 Jouault, C., F. Legendre, P. Grandcolas, and A. Nel. 2021. Revising dating estimates and the antiquity of eusociality  
408 in termites using the fossilized birth–death process. *Systematic Entomology* 46:592–610.



- 409 Kurumada, Y., S. Aoki, K. Aoki, D. Kato, M. Saneyoshi, K. Tsogtbaatar, B. F. Windley, and S. Ishigaki. 2020.  
410 Calcite U–Pb age of the Cretaceous vertebrate-bearing Bayn Shire Formation in the Eastern Gobi Desert of  
411 Mongolia: Usefulness of caliche for age determination. *Terra Nova* 32:246–252.
- 412 Lepage, T., D. Bryant, H. Philippe, and N. Lartillot. 2007. A general comparison of relaxed molecular clock models.  
413 *Molecular Biology and Evolution* 24:2669–2680.
- 414 Lewis, P. O. 2001. A likelihood approach to estimating phylogeny from discrete morphological character data.  
415 *Systematic Biology* 50:913–925.
- 416 Li, F., W. Ma, F. Meng, and H. Diao. 2021. Geochemical characteristics and geological significance of Daohugou  
417 Formation at Ningcheng County of Inner Mongolia, Eastern China. *Geological Journal* 56:2223–2239.
- 418 Pennell, M. W., J. M. Eastman, G. J. Slater, J. W. Brown, J. C. Uyeda, R. G. FitzJohn, M. E. Alfaro, and L. J.  
419 Harmon. 2014. geiger v2.0: an expanded suite of methods for fitting macroevolutionary models to phylogenetic  
420 trees. *Bioinformatics* 30:2216–2218.
- 421 Peppe, D. and A. Deino. 2013. Dating rocks and fossils using geologic methods. *Nature Education Knowledge* 4:1.
- 422 Pett, W. and T. A. Heath. 2020. Inferring the timescale of phylogenetic trees from fossil data. Pages 5.1:1–5.1:18  
423 *in* *Phylogenetics in the Genomic Era* (C. Scornavacca, F. Delsuc, and N. Galtier, eds.). No commercial publisher  
424 | Authors open access book.
- 425 Pyron, R. A. 2011. Divergence time estimation using fossils as terminal taxa and the origins of Lissamphibia.  
426 *Systematic Biology* 60:466–481.
- 427 Rambaut, A., A. J. Drummond, D. Xie, G. Baele, and M. A. Suchard. 2018. Posterior summarization in Bayesian  
428 phylogenetics using Tracer 1.7. *Systematic Biology* 67:901–904.
- 429 Rambaut, A. and N. C. Grassly. 1997. Seq-Gen: an application for the Monte Carlo simulation of DNA sequence  
430 evolution along phylogenetic trees. *Bioinformatics* 13:235–238.
- 431 Robinson, D. and L. Foulds. 1981. Comparison of phylogenetic trees. *Mathematical Biosciences* 53:131–147.
- 432 Ronquist, F., S. Klopfstein, L. Vilhelmsen, S. Schulmeister, D. L. Murray, and A. P. Rasnitsyn. 2012a. A total-  
433 evidence approach to dating with fossils, applied to the early radiation of the Hymenoptera. *Systematic Biology*  
434 61:973–999.
- 435 Ronquist, F., M. Teslenko, P. van der Mark, D. L. Ayres, A. Darling, S. Höhna, B. Larget, L. Liu, M. A. Suchard,  
436 and J. P. Huelsenbeck. 2012b. MrBayes 3.2: Efficient Bayesian phylogenetic inference and model choice across a  
437 large model space. *Systematic Biology* 61:539–542.

- 438 Schuster, A., S. Vargas, I. S. Knapp, S. A. Pomponi, R. J. Toonen, D. Erpenbeck, and G. Wörheide. 2018. Divergence  
439 times in demosponges (Porifera): first insights from new mitogenomes and the inclusion of fossils in a birth-death  
440 clock model. *BMC Evolutionary Biology* 18:1–11.
- 441 Shapiro, B., S. Y. Ho, A. J. Drummond, M. A. Suchard, O. G. Pybus, and A. Rambaut. 2011. A Bayesian  
442 phylogenetic method to estimate unknown sequence ages. *Molecular Biology and Evolution* 28:879–887.
- 443 Šmíd, J. and K. A. Tolley. 2019. Calibrating the tree of vipers under the fossilized birth-death model. *Scientific*  
444 *Reports* 9:1–10.
- 445 Stadler, T. 2010. Sampling-through-time in birth–death trees. *Journal of Theoretical Biology* 267:396–404.
- 446 Stadler, T. 2011. Simulating trees with a fixed number of extant species. *Systematic Biology* 60:676–684.
- 447 Stadler, T., A. Gavryushkina, R. C. Warnock, A. J. Drummond, and T. A. Heath. 2018. The fossilized birth-death  
448 model for the analysis of stratigraphic range data under different speciation modes. *Journal of Theoretical Biology*  
449 447:41–55.
- 450 Stadler, T., D. Kühnert, S. Bonhoeffer, and A. J. Drummond. 2013. Birth–death skyline plot reveals temporal  
451 changes of epidemic spread in hiv and hepatitis c virus (hcv). *Proceedings of the National Academy of Sciences*  
452 110:228–233.
- 453 Thomas, D. B., A. J. D. Tennyson, R. P. Scofield, T. A. Heath, W. Pett, and D. T. Ksepka. 2020. Ancient crested  
454 penguin constrains timing of recruitment into seabird hotspot. *Proceedings of the Royal Society B: Biological*  
455 *Sciences* 287:20201497.
- 456 Thorne, J., H. Kishino, and I. S. Painter. 1998. Estimating the rate of evolution of the rate of molecular evolution.  
457 *Molecular Biology and Evolution* 15:1647–1657.
- 458 Wang, X., Z. Zhou, H. He, F. Jin, Y. Wang, J. Zhang, Y. Wang, X. Xu, and F. Zhang. 2005. Stratigraphy and age  
459 of the daohugou bed in ningcheng, inner mongolia. *Chinese Science Bulletin* 50:2369–2376.
- 460 Zhang, C., T. Stadler, S. Klopstein, T. A. Heath, and F. Ronquist. 2016. Total-evidence dating under the fossilized  
461 birth–death process. *Systematic biology* 65:228–249.
